# Supplementary material
Source: HighWire-hosted journal article supplement (http://www.jneurosci.org/highwire/filestream/601448/field_highwire_adjunct_files/4/Supplemental_Figure.pdf)
Supplement: Supplemental_Figure.pdf [file Supplemental_Figure.pdf]

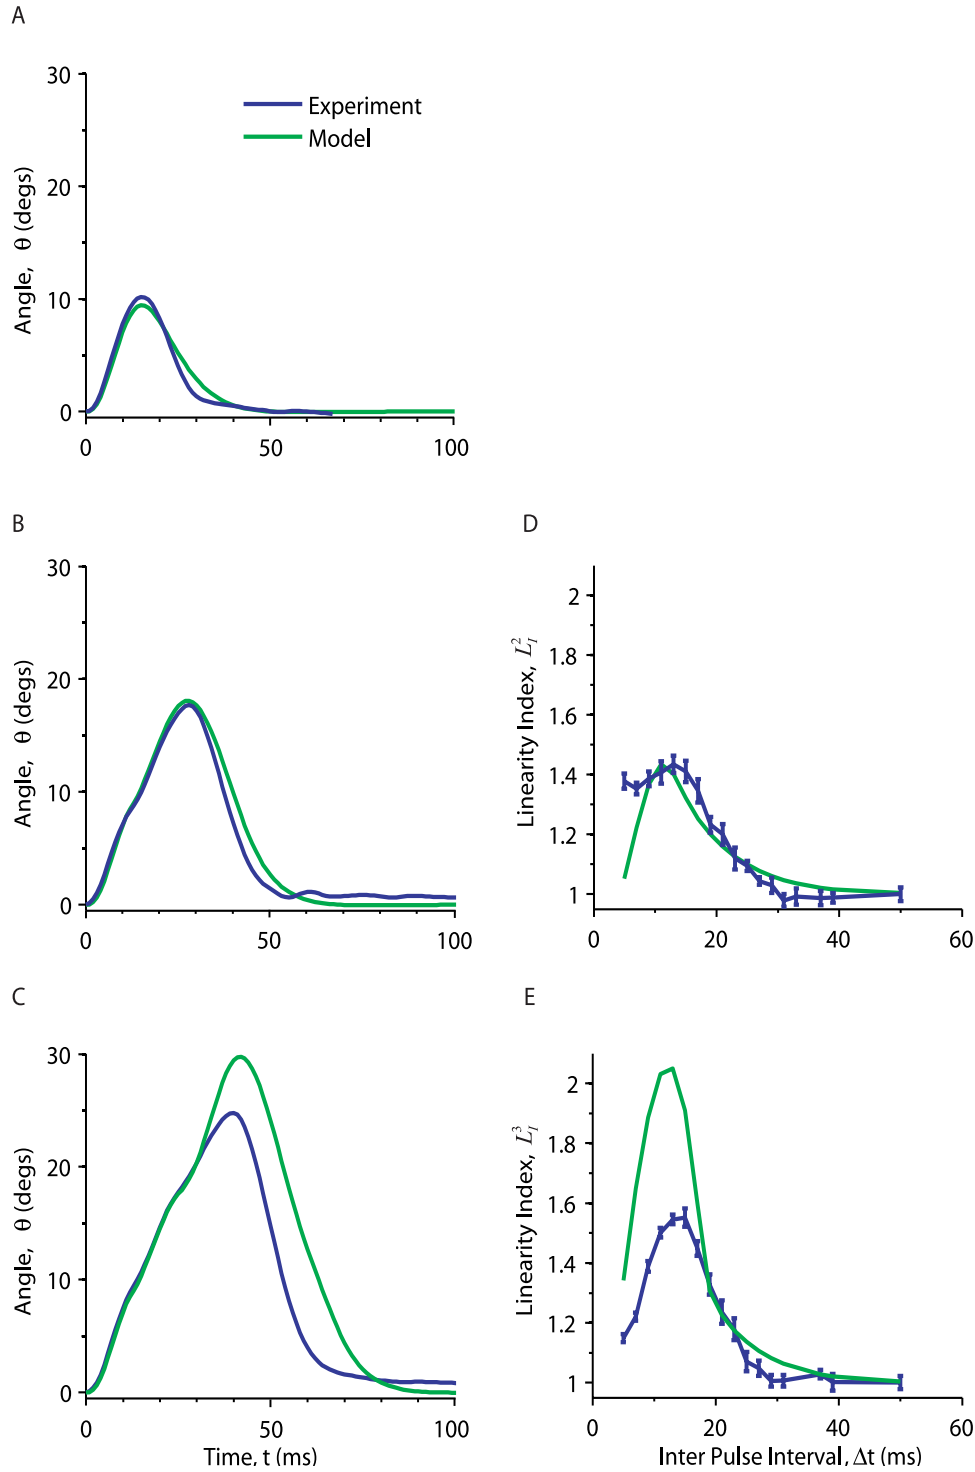

**Figure S1.** Temporal summation properties of whisker protraction responses to one, two and three pulses stimulating the facial motor nerve (FMN), measured experimentally (blue lines) and computed from our model with  $F_L(z) = 1$  (green lines). Conditions and notations as for Figure 5, except  $A = 0.82$  and  $r_0 = 2.8$ . **A**, Whisker protraction in response to single-pulse stimulation of the FMN. **B**, **C**, Whisker protraction in response to two- (**B**) and three- (**C**) pulse stimulations of the FMN with  $\Delta t = 13$  ms. **D**, **E**, Linearity Indices  $L_1^2$  (**D**) and  $L_1^3$  (**E**) versus  $\Delta t$ . Vertical bars denote SEM.
